# Supplementary material
Source: publisher site journal article supplement (https://www.spandidos-publications.com/2681/downloadSupplementary)
Supplement: Supplementary file 1 [file downloadSupplementary]

## Sheet: Sheet1
Correlation genes with TCIRG1 in the GSE16011 dataset
Gene	Pearson r
S100A11	0.784761
ARPC1B	0.772578
CAPG	0.759793
IL13RA1	0.756316
SIPA1	0.742321
SERPING1	0.74224
PLAUR	0.736662
FCGRT	0.733995
SERPINA1	0.729473
CEBPB	0.727054
SP100	0.726449
NPC2	0.722981
TNFRSF1A	0.722674
FAH	0.712839
CLIC1	0.711246
CTSB	0.70982
MVP	0.70882
GNA15	0.708178
TRIP6	0.704507
STAB1	0.704265
NCF1	0.703314
PTRF	0.702933
MRC2	0.702841
C1QC	0.701909
RRAS	0.701858
SH3TC1	0.701803
PRKCD	0.700421
VAMP8	0.696044
C1R	0.695617
SLC15A3	0.695186
SP140L	0.69369
PLTP	0.693304
GBGT1	0.690596
MGAT1	0.689283
TNFRSF1B	0.688379
C5AR1	0.688371
LAIR1	0.687933
AGTRAP	0.687155
GLMP	0.686881
RNF135	0.68652
CD14	0.685977
LAPTM5	0.684812
ITGB2	0.684713
FERMT3	0.684302
PLK3	0.684229
NCF4	0.683495
SLC8B1	0.68311
CEBPD	0.682308
EMP3	0.681349
PYCARD	0.680911
IL4R	0.680778
IQGAP1	0.679298
BTBD19	0.678361
SYK	0.678151
HMHA1	0.677933
FUCA2	0.677891
ARHGAP30	0.677538
SWAP70	0.677309
GSAP	0.676777
SERPINB1	0.676519
SLC10A3	0.675621
COPZ2	0.67531
RAC2	0.675251
RHOG	0.673027
ITGAM	0.672368
ICAM1	0.67208
TNFSF13	0.671845
MYO1F	0.671482
ITGA5	0.671056
GPX1	0.670607
C1QA	0.669649
STAT5A	0.668672
HCLS1	0.66761
C1RL	0.667291
GRN	0.667159
ALOX5	0.667111
TGFB1	0.66668
PLXND1	0.664098
CLEC7A	0.662652
ARHGAP9	0.662149
TMEM109	0.661955
MXRA8	0.661731
ALDH3B1	0.661515
TIMP1	0.661249
LILRB2	0.661232
S100A4	0.660664
TGFBI	0.660613
TNFAIP8	0.659922
RHBDF2	0.659742
HSPA6	0.65906
THEMIS2	0.658937
MUC1	0.657691
CASP8	0.6575
ENG	0.657094
FBP1	0.656439
CYBA	0.656391
EMILIN1	0.654555
ITPRIP	0.65419
CSF1	0.653953
ELF4	0.652957
TSPO	0.651207
HFE	0.651204
SQRDL	0.65094
PRR13	0.650912
TLR2	0.650599
PIK3R5	0.650178
GSDMD	0.649832
C1QB	0.649713
SHC1	0.648893
PLBD1	0.648544
DPYD	0.648411
LHFPL2	0.647924
STEAP3	0.647888
DSE	0.647654
PPM1M	0.646928
SLC7A7	0.64688
TGFBR2	0.645861
CALHM2	0.644619
CHPF2	0.643944
FCER1G	0.643277
APOBEC3C	0.642804
FCGBP	0.642503
CYP27A1	0.641185
CASP1	0.64107
SLC11A1	0.640547
MAN2B1	0.638828
CYTH4	0.638268
LGALS3BP	0.638079
IER3	0.637383
JAK3	0.637073
GSTK1	0.637025
FLNA	0.636511
EFEMP2	0.635967
LPXN	0.635344
WIPI1	0.635308
PLIN3	0.633757
RAB27A	0.633747
FCGR2A	0.632596
VSIG4	0.632129
CCR1	0.63167
CFB	0.631243
HLA-E	0.631136
JUNB	0.631008
CARD16	0.630224
CERS2	0.63019
MSN	0.629466
NAGA	0.629193
PTPN6	0.62888
VAMP5	0.628816
CPQ	0.628553
IL10RA	0.628551
SNX20	0.62852
GALM	0.628391
SH3BGRL3	0.628307
PYGL	0.62809
TMEM106A	0.62746
SCPEP1	0.627075
HEXA	0.626801
LRCH4	0.626404
HSD3B7	0.626312
COL8A2	0.625404
IFITM3	0.625107
P4HA2	0.625073
CD164	0.624992
CD37	0.624626
HSPB1	0.624526
CYB561A3	0.624398
IFITM2	0.624396
STXBP2	0.623984
IL15	0.623298
DENND3	0.622981
RNASET2	0.62294
MSR1	0.622204
CASP4	0.621693
KYNU	0.621354
RBM47	0.621018
CRTAP	0.620333
DENND2D	0.620029
LILRB1	0.619944
CTSZ	0.619759
CD151	0.619701
TYMP	0.619267
HCK	0.619074
SRPX2	0.618888
IL15RA	0.618498
RNF149	0.617468
FCGR2B	0.617247
ZFP36	0.617135
FXYD5	0.616968
NFATC2	0.616961
LCP2	0.616252
CD300A	0.616226
CFI	0.616162
STAT6	0.615806
TRIM38	0.615481
SIL1	0.615398
PQLC3	0.614931
DDB2	0.614774
PLXNB2	0.614561
FCGR2C	0.614421
LRP10	0.61358
RAB32	0.613168
CTSS	0.612571
CNPY4	0.612355
ZDHHC12	0.612337
APOBEC3G	0.612194
FPR1	0.61185
PHF11	0.611701
TYROBP	0.610639
PPP1R18	0.61056
OSBPL3	0.610095
SLA	0.610041
DEF6	0.609451
LYN	0.609382
MYO7A	0.609089
CARD19	0.60838
LTBP2	0.606951
LAT2	0.606523
NFKBIZ	0.606286
ESYT1	0.606145
CD58	0.605419
OLFML2B	0.605404
TWF2	0.605317
ANG	0.604932
TNFRSF11A	0.604469
MYOF	0.604373
SYNGR2	0.603061
ARHGAP18	0.602572
ADAP2	0.602076
ANXA2	0.601777
NUDT22	0.600861
C1ORF162	0.600265
LAMB2	0.599938
CD109	0.599747
MMP19	0.599534
LGALS1	0.599485
LY96	0.598721
C1S	0.598109
CD163	0.598078
CTSD	0.597634
TNFSF8	0.59705
MOB1A	0.596862
PTGS1	0.596426
SYNPO	0.595929
CTSA	0.595516
SASH3	0.595221
H6PD	0.594826
CSF1R	0.594802
CCDC109B	0.593942
VAV1	0.59322
GPSM3	0.593132
NINJ1	0.593006
COL6A2	0.592935
DHRS3	0.592419
GMPPA	0.592337
DOK3	0.592235
CTBS	0.591539
SERTAD1	0.591106
PIK3CG	0.590975
DAP	0.590695
GAA	0.590662
PLAU	0.590284
HEXB	0.590221
TNFRSF14	0.590189
PLOD3	0.590148
PLP2	0.589159
CSTA	0.589001
TNFAIP3	0.588497
DPP7	0.58805
KLF6	0.588041
CD4	0.587606
MYD88	0.587591
FAM20C	0.587428
ABCC3	0.587309
REEP4	0.586808
CIB1	0.586442
SIGLEC9	0.58617
PLA2G15	0.585692
C3	0.585639
ZFP36L1	0.58541
SPOCD1	0.58534
IGFLR1	0.585332
GPX8	0.585034
TBXAS1	0.584627
TNFAIP2	0.584433
RNF144B	0.584277
CECR1	0.5839
HLA-DMA	0.583819
SLC43A3	0.583761
BHLHE40	0.583713
EDEM2	0.583282
LPAR6	0.582899
CD99	0.582814
RAB20	0.582649
ILK	0.582441
ANXA1	0.581226
PIGT	0.580908
NOD1	0.580722
ANXA2P2	0.580584
GPR84	0.580374
PLOD1	0.580072
PIK3CD	0.580009
MKNK1	0.57995
MBD2	0.579699
ADGRE2	0.579464
SOCS3	0.579462
ISG20	0.579261
VIM	0.579123
CSF3R	0.579119
RHOC	0.57886
TMEM173	0.578822
CTSC	0.578807
DOCK8	0.578571
P4HB	0.57845
MYL12A	0.57839
B3GNT5	0.578303
LOXL1	0.578288
SLAMF8	0.578063
RNASE4	0.577991
FAM114A1	0.57792
C10ORF10	0.577576
NADSYN1	0.577541
PIK3AP1	0.576928
CD44	0.576628
DCTD	0.576529
FNDC3B	0.576427
CXCR4	0.576215
COLGALT1	0.576105
FUCA1	0.575645
CD63	0.575385
CACNA2D4	0.575248
INAFM1	0.575037
EHD2	0.573665
MAN1A1	0.573341
PARVG	0.573213
NCF2	0.572749
MYH9	0.57269
SBNO2	0.572596
LATS2	0.572244
TPP1	0.57199
CHI3L1	0.571946
SLC2A5	0.571876
FGR	0.571766
CLDN23	0.571634
MLKL	0.571416
CIDEB	0.571052
ARL11	0.570593
PLSCR1	0.570308
TAPBP	0.57025
STAT3	0.570205
SHISA5	0.570172
ALOX5AP	0.569526
TRIM22	0.569091
SPATS2L	0.568826
CYB561D2	0.567693
POLD4	0.567618
C3AR1	0.567484
NNMT	0.567339
MICA	0.567264
SAT1	0.567149
COL8A1	0.566994
ELK3	0.566948
DNASE1L1	0.566883
NUCB1	0.566299
RUNX1-IT1	0.565292
AIM1	0.564878
UNC93B1	0.564727
RILPL2	0.564425
HLA-J	0.564327
ITGB5	0.563855
PRDM1	0.563633
TRIM56	0.563323
WWTR1	0.563204
NLRP3	0.562727
PCOLCE	0.562723
TAGLN2	0.562459
ADPRH	0.562312
LILRB3	0.562259
CSF2RB	0.562205
PLEKHA4	0.562057
SERPINH1	0.561955
HLA-F	0.561675
RREB1	0.561448
F13A1	0.561159
HEBP1	0.560939
LOXL3	0.560638
PILRA	0.560487
TRAM1	0.560075
RNASE2	0.560058
DUSP23	0.560052
HLA-B	0.559773
ARHGAP4	0.559699
MGC24103	0.55947
WAS	0.559359
TMEM220	0.559349
SLC39A8	0.559154
OLFML3	0.558781
ST3GAL1	0.558763
ARRDC1	0.558755
CYTIP	0.558713
REXO2	0.558641
CD53	0.55862
KCNQ1	0.558472
LCP1	0.557801
SDF4	0.557695
RASSF5	0.557236
TRIM21	0.5572
AIF1	0.557118
VDR	0.556899
ASL	0.556465
VASN	0.555941
MT1G	0.555616
PDLIM7	0.555101
MAP3K6	0.554394
QSOX1	0.554268
MAPKAPK3	0.554078
CD86	0.554039
GPR183	0.553515
FYB	0.553455
SRGN	0.55336
IMPA2	0.553293
RUNX1	0.553178
MFSD1	0.553018
ARHGDIB	0.552495
SAMSN1	0.552491
WASF2	0.552432
AMPD3	0.552094
BRI3	0.552074
METRNL	0.551673
SQSTM1	0.551653
HLA-A	0.551372
RAB13	0.551001
BLVRB	0.55093
TOR4A	0.550871
IFNGR2	0.550637
CFD	0.550302
PLEKHO2	0.54991
TAGLN	0.549856
MT2A	0.549647
AEBP1	0.549613
SLC38A6	0.549355
HLA-G	0.549265
TRPV2	0.548835
DEDD2	0.548662
CYBB	0.54865
FAS	0.548631
CAPNS1	0.548625
C10ORF11	0.548404
LY75	0.548371
PRSS23	0.548356
TFEC	0.548225
CD33	0.548014
NUPR1	0.547889
HK3	0.547804
LGALS3	0.54762
ADPGK	0.547377
CXCL16	0.547365
LRRC25	0.547095
MYO1G	0.546775
CARD6	0.546682
MGAT4B	0.546608
RER1	0.546232
SAMD9L	0.545947
FLII	0.545873
LOXL2	0.54575
APBB1IP	0.545202
STK10	0.545176
TSPAN4	0.545111
FZD7	0.545053
CAPZB	0.544987
FAM129B	0.544934
GYPC	0.544846
LTBR	0.54473
PLEK	0.544503
FKBP5	0.544392
CTSL	0.544
CD74	0.543741
ADSSL1	0.543167
MT1X	0.542732
RELB	0.541932
H2AFJ	0.541744
SUMF1	0.541221
HMGCL	0.540668
PPCS	0.540571
NMI	0.540473
HACD4	0.539623
SH2B3	0.53936
NTAN1	0.539266
HLA-DRB1	0.539193
DNAJC22	0.539113
CORO1A	0.538747
CD93	0.538051
EVA1B	0.537823
PARP9	0.537501
GCLM	0.537394
TRIP10	0.537381
UPP1	0.537153
S100A6	0.537119
DAB2	0.537056
ARPC4	0.536904
ERP44	0.536883
BNC2	0.536728
PCED1B	0.536369
MAP3K8	0.536053
THBS1	0.535901
SERPINE1	0.535711
SSR3	0.535705
GAL3ST4	0.535661
G0S2	0.535144
HLA-DOA	0.534781
DTX3L	0.534745
TREM2	0.534743
FHL3	0.534576
OSMR	0.534226
RIN3	0.534222
SELPLG	0.534168
IL17RA	0.53398
GPR65	0.533732
C2	0.533355
ACADVL	0.533338
TEX264	0.532812
LINC01503	0.532675
HAVCR2	0.532653
TPD52L2	0.532448
TMC8	0.532128
IRAK4	0.531993
GPR132	0.531737
COL5A2	0.53159
MAFB	0.531397
SERPINB8	0.531071
THBD	0.530958
FCGR1B	0.530878
TNFRSF12A	0.530832
RARRES2	0.530294
IL1B	0.530104
PTP4A2	0.530041
DOK1	0.52996
GNS	0.529867
TMEM8A	0.52971
ICAM3	0.529406
HLA-DMB	0.529339
KHNYN	0.528755
ZYX	0.528546
SUSD6	0.528502
SLC39A13	0.527527
OSM	0.527261
ABHD15	0.527221
FAM46A	0.527003
NOD2	0.526815
IBSP	0.526338
CYB561	0.526322
MT1E	0.526227
CLCF1	0.525772
TRAM2	0.525735
SLC2A10	0.525504
COL6A3	0.525347
PSMB10	0.525223
FAM26F	0.52472
GLB1L	0.524624
HLA-DQB1	0.524482
ZGPAT	0.524273
TMCO4	0.524116
CLEC2B	0.523879
TMEM176A	0.52348
GADD45B	0.523201
GMIP	0.523047
DOCK2	0.523039
BCKDK	0.522903
TMEM176B	0.522702
CAPZA1	0.522575
LUM	0.522509
IFI35	0.522456
P3H1	0.521964
DYNLT3	0.52184
ATL3	0.521767
SGSH	0.521697
MS4A6A	0.521679
SGMS2	0.521578
PFN1	0.52153
EHD4	0.52146
MICALL2	0.521379
RNASE6	0.521351
GM2A	0.521293
ACTN1	0.520879
SSH3	0.520773
ITPRIPL2	0.520237
MILR1	0.51987
SLC22A18	0.519618
HDLBP	0.519552
CLEC5A	0.519319
PTPRC	0.519172
LILRB4	0.519143
MYL9	0.519086
PLS3	0.518758
CCL2	0.518683
SLC1A5	0.518643
TPM3	0.518597
FN1	0.51856
ARL6IP4	0.518528
TLR1	0.51848
PLCG2	0.518445
MNDA	0.518436
COL1A2	0.517655
VASP	0.51758
SERPINB6	0.51755
HLA-C	0.517536
CARD8-AS1	0.517035
FZD1	0.516924
EVI2B	0.516795
COL1A1	0.516242
LMNA	0.516204
WTAP	0.515954
ANXA11	0.515891
SPRED3	0.515758
PTPN22	0.515709
PTX3	0.515287
RARRES3	0.514804
PARP10	0.514618
SLCO2B1	0.514612
LTBP3	0.514467
SMIM3	0.514266
NPEPL1	0.514205
DRAM1	0.514089
MAN2A1	0.514089
CPVL	0.513459
EMP1	0.512874
TAF10	0.512844
ZMYM6	0.51282
SPI1	0.512744
IDUA	0.512335
FHOD1	0.51181
C16ORF54	0.511672
PPP1R3B	0.511433
ACCS	0.511129
FMNL1	0.511011
GLRX	0.510802
MT1F	0.51079
PIEZO1	0.510755
SEC31A	0.510411
SPTLC2	0.510368
SEPN1	0.510359
CC2D1B	0.510318
PSMB8-AS1	0.510048
CAST	0.510048
PARP14	0.50999
PROCR	0.509954
MYADM	0.509861
SNX9	0.50964
SELM	0.508922
LGALS9	0.508859
RBMS1	0.508817
ANXA4	0.508701
SIX5	0.508687
EMB	0.508658
FAM129A	0.508344
MAFK	0.50808
PHC2	0.507845
DUSP1	0.507828
AP2S1	0.507815
WDFY4	0.50778
IFI16	0.507679
BCL2A1	0.507581
CCR5	0.507572
GPNMB	0.507557
CYBRD1	0.507528
LACTB	0.507412
CD276	0.507347
CD1D	0.50721
ADGRE5	0.506718
BORCS8	0.506717
MS4A4A	0.506688
RPS6KA1	0.506457
FPR3	0.505836
HGSNAT	0.505792
IRF1	0.505414
P2RX4	0.505395
ITGB4	0.505372
B4GALT7	0.505333
ANTXR2	0.505194
EFEMP1	0.505047
FES	0.504984
MAN1B1	0.504829
TNC	0.504393
DCBLD2	0.504374
HCST	0.504312
MGST2	0.504187
PARVB	0.504131
TMEM140	0.50388
P3H2	0.503748
PSME1	0.503587
ERP29	0.503491
PROS1	0.503479
TMEM51	0.503408
TREM1	0.503237
LINC00963	0.503126
BST2	0.502939
TRIM6	0.502938
MS4A7	0.502919
B4GALT1	0.50272
HAMP	0.502688
OSTF1	0.502557
RGS1	0.502512
LOC101926963	0.502231
CDCP1	0.50214
PNN	0.502042
MERTK	0.501942
ANXA5	0.501644
PSMB8	0.501427
IL10RB	0.501403
CALU	0.501374
RCSD1	0.501287
RNF130	0.501268
SEC24D	0.501167
PPIC	0.501013
RAP2B	0.500424
ZCCHC14	-0.500574
ZYG11B	-0.500831
DDX5	-0.501508
CASKIN1	-0.501837
C22ORF39	-0.502027
KIAA1644	-0.502037
APBB2	-0.502291
CRB1	-0.502548
GPATCH11	-0.50263
SLC9A6	-0.50273
CYFIP2	-0.503271
PAFAH1B1	-0.503423
CNOT6	-0.503874
KAT7	-0.504159
RIPPLY2	-0.504333
NRXN1	-0.504437
ZNF10	-0.504469
SCN3A	-0.50489
TMEM136	-0.504914
TOX3	-0.505576
WDR17	-0.505702
ATE1	-0.505995
CADM2	-0.506006
ATP6V1G2	-0.506096
ACVR2A	-0.506251
CELSR3	-0.506968
JPH3	-0.507243
NBEA	-0.508076
HMGCS1	-0.508445
ANGEL2	-0.50873
HECTD4	-0.509327
TACC2	-0.509388
SCAMP1	-0.509519
ICK	-0.510282
HERC1	-0.510582
KBTBD7	-0.510714
EXOC6	-0.511227
KIF5C	-0.511235
RAB9B	-0.511272
MMD2	-0.511456
SHANK2	-0.512018
KLHL42	-0.512069
TMEM108	-0.512097
BTRC	-0.512474
CBR4	-0.512795
MAPT	-0.513244
PLEKHM3	-0.514471
FAM216A	-0.514818
MMP16	-0.515541
LSAMP	-0.516028
RAB33A	-0.516129
DPP10	-0.516145
ATP2B2	-0.516185
C5ORF30	-0.516482
RMND5A	-0.517137
ERCC6L2	-0.517508
C16ORF87	-0.518156
PAK3	-0.518193
FBXW11	-0.518841
SOX8	-0.521013
ARID4A	-0.5216
DCLRE1A	-0.521621
STXBP1	-0.521794
WASF1	-0.521834
CHD2	-0.522294
SFXN1	-0.522481
ZADH2	-0.522639
BRMS1L	-0.523318
LMF1	-0.523642
ZNF248	-0.523853
APBA2	-0.524199
ATP2A2	-0.524507
TSPYL4	-0.524827
PWAR6	-0.524942
MAPK8	-0.525137
ABI2	-0.525276
FAM217B	-0.525399
TMEM206	-0.525638
SYNJ1	-0.525667
ZNF510	-0.525865
ZNF184	-0.525884
LINGO1	-0.526098
ACVR2B	-0.526432
SCG3	-0.526436
FBXO11	-0.527033
LINC00294	-0.527109
PHF20L1	-0.527655
BEX1	-0.529414
TRERF1	-0.52956
LDOC1L	-0.5297
ARMCX4	-0.530291
RBM12B	-0.530981
RAPGEF4	-0.531989
KIZ	-0.532014
TNR	-0.532352
NUDT21	-0.533376
DENND5B	-0.53355
ZNF704	-0.53421
DLGAP1	-0.534483
SOX6	-0.534569
FAM199X	-0.535223
FRY	-0.536007
RPRD1A	-0.536706
CELF5	-0.537123
PID1	-0.537753
FAM126B	-0.538166
PLCXD2	-0.538879
TM9SF3	-0.538957
IDI1	-0.540045
TMEM35	-0.541218
ZNF253	-0.54168
TDRKH	-0.541985
PPM1A	-0.54221
SRPK1	-0.542439
RAPGEF2	-0.54245
C12ORF76	-0.542742
TOMM20	-0.543037
CSTF2T	-0.543565
TOP2B	-0.543881
CLASP2	-0.544674
RPAIN	-0.544741
MYO5A	-0.545102
ZNF711	-0.545502
RBM8A	-0.545571
PTCH1	-0.54603
RALGPS1	-0.546697
NTRK3	-0.548658
MICU1	-0.548699
ADAM22	-0.550066
RABGAP1L	-0.550361
LINC00938	-0.55223
ELFN2	-0.552519
HNRNPA3	-0.553387
TADA1	-0.553939
ADGRA1	-0.554965
NOLC1	-0.555424
SEZ6L	-0.555467
APPBP2	-0.556882
UNC80	-0.557373
CTCF	-0.557466
MAMLD1	-0.558674
HNRNPA0	-0.559339
CEP97	-0.559603
MEX3A	-0.559628
ASF1A	-0.560301
LSM11	-0.560452
ADGRB3	-0.561227
MAP2	-0.562156
ELAVL4	-0.56288
MSL1	-0.563982
FAM110B	-0.564558
SHPRH	-0.565
SCAPER	-0.565094
KIF3A	-0.565181
HDGFRP3	-0.565573
MTMR9	-0.566048
ATP9A	-0.566062
RNFT2	-0.567158
DOK6	-0.567388
SERP2	-0.567414
FMR1	-0.568251
ADO	-0.568467
KLHL23	-0.568547
PHYHIPL	-0.568867
PPM1E	-0.569046
FAM117B	-0.569487
STRBP	-0.569701
RFTN2	-0.570648
GNG4	-0.570848
RPRD2	-0.571396
CHML	-0.573062
HDAC4	-0.573365
PUM2	-0.574287
PDZD8	-0.574985
AKT3	-0.575822
KPNA5	-0.576388
PRPSAP2	-0.576535
TMEM170B	-0.57892
ANKRD46	-0.57953
SRGAP3	-0.579989
TERF2	-0.580413
NAV1	-0.582768
LYRM7	-0.583506
TMOD2	-0.58362
RBSN	-0.585696
PPM1L	-0.588617
MYCN	-0.588809
KBTBD6	-0.588888
ZFP1	-0.590172
KLF12	-0.591209
MOAP1	-0.592739
CDK5R1	-0.593175
TRIM37	-0.594142
SOCS7	-0.595932
SS18L1	-0.597031
JMY	-0.597727
PJA1	-0.600935
GSTA4	-0.603846
SPAST	-0.608159
CCSER2	-0.609398
PITPNC1	-0.613741
HMGCR	-0.614187
AKAP6	-0.616738
PANK1	-0.616791
ZDHHC22	-0.616877
GDAP1	-0.619497
CEP68	-0.622717
AMN1	-0.62624
HNRNPH3	-0.626972
PANK3	-0.62809
ZNF25	-0.630662
GDPD1	-0.640065
KAT6B	-0.640094
SCAI	-0.641219
ARHGEF9	-0.654138
GATAD2B	-0.686013
CAMSAP2	-0.691094
